# Supplementary material for: Complex formation of anti‐VEGF‐C with VEGF‐C released during blood coagulation resulted in an artifact in its serum pharmacokinetics
Source: PubMed Central journal article supplement (PMC7053556; doi:10.1002/prp2.573), 2020-03-03

Fig. S1

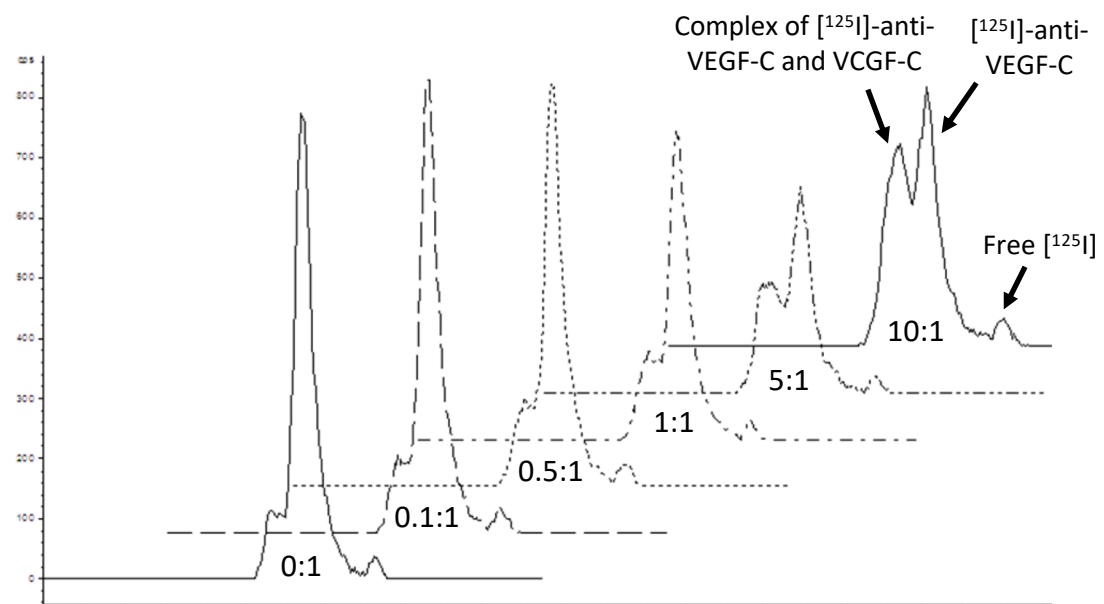

Supplement: PRP2-8-e00573-s001.pdf [file PRP2-8-e00573-s001.pdf]
